# Supplementary material for: VDR Variants rather than Early Pregnancy Vitamin D Concentrations Are Associated with the Risk of Gestational Diabetes: The Ma’anshan Birth Cohort (MABC) Study
Source: Hindawi journal article supplement (doi:10.1155/2019/8313901), 2019-06-24
Supplement: f1 [file 8313901.f1.pdf]

Supplementary Table 1. Vitamin D concentration in the first trimester according different maternal characteristics.

| <b>Variables</b>                             | <b>Vitamin D (Mean <math>\pm</math> SD)</b> | <b>P</b>         |
|----------------------------------------------|---------------------------------------------|------------------|
| <b>Age</b>                                   |                                             | <b>0.029</b>     |
| <25                                          | 18.3 $\pm$ 8.3                              |                  |
| 25~30                                        | 18.0 $\pm$ 8.3                              |                  |
| 30~35                                        | 18.7 $\pm$ 8.4                              |                  |
| $\geq$ 35                                    | 20.1 $\pm$ 9.8                              |                  |
| <b>BMI</b>                                   |                                             | <b>0.014</b>     |
| <18.5                                        | 18.0 $\pm$ 8.8                              |                  |
| 18.5~24                                      | 18.1 $\pm$ 8.2                              |                  |
| 24~28                                        | 18.7 $\pm$ 8.8                              |                  |
| $\geq$ 28                                    | 21.2 $\pm$ 8.3                              |                  |
| <b>Parity</b>                                |                                             | <b>&lt;0.001</b> |
| Nulliparous                                  | 18.0 $\pm$ 8.3                              |                  |
| Multiparous                                  | 19.9 $\pm$ 9.2                              |                  |
| <b>Education</b>                             |                                             | <b>0.015</b>     |
| Primary school or below                      | 19.8 $\pm$ 8.8                              |                  |
| Middle school                                | 19.1 $\pm$ 8.7                              |                  |
| High school                                  | 18.5 $\pm$ 8.6                              |                  |
| Junior college                               | 17.9 $\pm$ 8.1                              |                  |
| Undergraduate or above                       | 17.8 $\pm$ 8.2                              |                  |
| <b>Monthly income (Chinese Yuan)</b>         |                                             | 0.666            |
| <1000                                        | 18.6 $\pm$ 9.2                              |                  |
| 1000~2500                                    | 18.2 $\pm$ 8.4                              |                  |
| 2500~4000                                    | 18.1 $\pm$ 8.3                              |                  |
| >4000                                        | 18.5 $\pm$ 8.5                              |                  |
| <b>Smoking in early pregnancy</b>            |                                             | <b>0.044</b>     |
| No                                           | 18.3 $\pm$ 8.4                              |                  |
| Yes                                          | 16.8 $\pm$ 7.7                              |                  |
| <b>Drinking</b>                              |                                             | 0.940            |
| Never                                        | 18.2 $\pm$ 8.4                              |                  |
| Occasionally                                 | 18.2 $\pm$ 8.4                              |                  |
| Regularly                                    | 17.0 $\pm$ 5.3                              |                  |
| <b>Seasons of blood draw</b>                 |                                             | <b>&lt;0.001</b> |
| Spring                                       | 16.8 $\pm$ 7.3                              |                  |
| Summer                                       | 21.1 $\pm$ 8.6                              |                  |
| Autumn                                       | 17.0 $\pm$ 7.9                              |                  |
| Winter                                       | 15.6 $\pm$ 8.0                              |                  |
| <b>Multi-vitamin intake before pregnancy</b> |                                             | <b>&lt;0.001</b> |
| Never                                        | 18.0 $\pm$ 8.3                              |                  |

|                                                |             |                  |
|------------------------------------------------|-------------|------------------|
| 1~2 times/week                                 | 18.5 ± 8.1  |                  |
| 3~6 times/week                                 | 20.3 ± 10.5 |                  |
| Everyday                                       | 21.7 ± 9.8  |                  |
| <b>Multi-vitamin intake in early pregnancy</b> |             | <b>&lt;0.001</b> |
| Never                                          | 17.2 ± 7.8  |                  |
| 1~2 times/week                                 | 20.2 ± 7.6  |                  |
| 3~6 times /week                                | 20.6 ± 9.2  |                  |
| Everyday                                       | 22.0 ± 9.6  |                  |

Supplementary Table 2. Linear regression for factors influence concentration of vitamin D in the first trimester.

| Variable                                       | Coefficient | Lower | Upper | P                |
|------------------------------------------------|-------------|-------|-------|------------------|
| <b>Gestational weeks</b>                       | 0.15        | 0.02  | 0.29  | <b>0.024</b>     |
| <b>Parity</b>                                  | 1.30        | 0.30  | 2.30  | <b>0.011</b>     |
| <b>Age</b>                                     | 0.01        | -0.08 | 0.10  | 0.813            |
| <b>BMI</b>                                     | 0.16        | 0.06  | 0.26  | <b>0.003</b>     |
| <b>Education</b>                               | -0.58       | -0.86 | -0.29 | <b>&lt;0.001</b> |
| <b>Income</b>                                  | 0.26        | -0.11 | 0.64  | 0.170            |
| <b>Smoking</b>                                 | -1.76       | -3.25 | -0.27 | <b>0.020</b>     |
| <b>Drinking</b>                                | -0.15       | -1.20 | 0.90  | 0.779            |
| <b>Multi-vitamin intake before pregnancy</b>   | 0.34        | -0.10 | 0.77  | 0.128            |
| <b>Multi-vitamin intake in early pregnancy</b> | 1.63        | 1.37  | 1.90  | <b>&lt;0.001</b> |
| <b>Season</b>                                  | -1.00       | -1.27 | -0.73 | <b>&lt;0.001</b> |

Supplementary Table 3. Stratified analysis of association of vitamin D and the risk of GDM according to different genotypes.

| Genotypes        | Vitamin D     | Adjusted OR (95%CI) | P for interactions |
|------------------|---------------|---------------------|--------------------|
| <b>rs1544410</b> |               |                     | 0.313              |
| CC               | Normal        | 1.00                |                    |
|                  | Insufficiency | 0.93 (0.55-1.58)    |                    |
| CT               | Normal        | 1.00                |                    |
|                  | Insufficiency | 0.27 (0.02-4.87)    |                    |
| <b>rs731236</b>  |               |                     | 0.693              |
| AA               | Normal        | 1.00                |                    |
|                  | Insufficiency | 0.89 (0.52-1.52)    |                    |
| GA               | Normal        | 1.00                |                    |
|                  | Insufficiency | 1.53 (0.05-45.94)   |                    |

|                  |               |                  |       |
|------------------|---------------|------------------|-------|
| <b>rs7041</b>    |               |                  | 0.190 |
| AA               | Normal        | 1.00             |       |
|                  | Insufficiency | 1.36 (0.58-3.23) |       |
| CA/CC            | Normal        | 1.00             |       |
|                  | Insufficiency | 0.59 (0.29-1.20) |       |
| <b>rs2282679</b> |               |                  | 0.481 |
| TT               | Normal        | 1.00             |       |
|                  | Insufficiency | 0.67 (0.31-1.41) |       |
| GT/GG            | Normal        | 1.00             |       |
|                  | Insufficiency | 1.22 (0.56-2.68) |       |
| <b>rs3829251</b> |               |                  | 0.615 |
| GG               | Normal        | 1.00             |       |
|                  | Insufficiency | 1.05 (0.47-2.34) |       |
| GA/AA            | Normal        | 1.00             |       |
|                  | Insufficiency | 0.81 (0.39-1.65) |       |
| <b>rs6013897</b> |               |                  | 0.688 |
| TT               | Normal        | 1.00             |       |
|                  | Insufficiency | 0.91 (0.50-1.64) |       |
| AT/AA            | Normal        | 1.00             |       |
|                  | Insufficiency | 0.79 (0.26-2.41) |       |
| <b>rs6599638</b> |               |                  | 0.641 |
| GG               | Normal        | 1.00             |       |
|                  | Insufficiency | 1.05 (0.38-2.90) |       |
| GA/AA            | Normal        | 1.00             |       |
|                  | Insufficiency | 0.83 (0.43-1.59) |       |

Adjusted OR is adjusted for age, pre-pregnancy BMI, family history of diabetes, parity, smoking, drinking, gestational week of blood withdrawn, income, education and conception season.
